# Supplementary material for: Formation of carbyne and graphyne on transition metal surfaces
Source: Royal Society of Chemistry journal article supplement (doi:10.1039/c4nr03757j), 2014-01-01
Supplement: c4nr03757j1.pdf [file c4nr03757j1.pdf]

## Supplementary Information for

# Formation of carbyne on transition metal surface

*Qinghong Yuan<sup>a</sup>, Feng Ding<sup>a\*</sup>*

<sup>a</sup> Institute of Textiles and Clothing, Hong Kong Polytechnic University, Kowloon, Hong Kong, Peoples Republic of China, E-mail: feng.ding@polyu.edu.hk

### Computational details

A three layer thick metal slab with the bottom layer fixed was used to represent the metal surfaces (e.g. Cu(111), Ni(111), Rh(111) and Ru(0001)). For each carbon clusters  $C_N$  ( $N=1-17$ ) on metal surfaces, several different configurations are optimized and the lowest one was taken as the ground state structure (see Ref. <sup>1</sup> for details). The super-cell of the slab model is chosen appropriately to avoid the interaction between neighbor carbon clusters. All calculations were carried out using a density-functional theory (DFT) method implemented in the Vienna Ab initio Simulation Package (VASP).<sup>2,3</sup> The ion-electron interactions are treated with the projected augmented wave (PAW) pseudo-potentials<sup>4</sup> and the general gradient approximation (GGA) parameterized by Perdew, Burke and Ernzerhof (PBE)<sup>5</sup> was used as exchange-correlation functional. The kinetic energy cutoff is set as 400 eV. For each structure, energy was optimized until the force component on every atom was less than 0.02 eV/Å. Non-spin-polarized DFT methods were used for Cu, Rh and Ru metals and

spin-polarized DFT method was used for Ni. The STM images are obtained for the electron filled states at  $-2.0$  and  $+2.0$  eV bias and calculated within the Tersoff-Hamman approximation.<sup>6</sup>

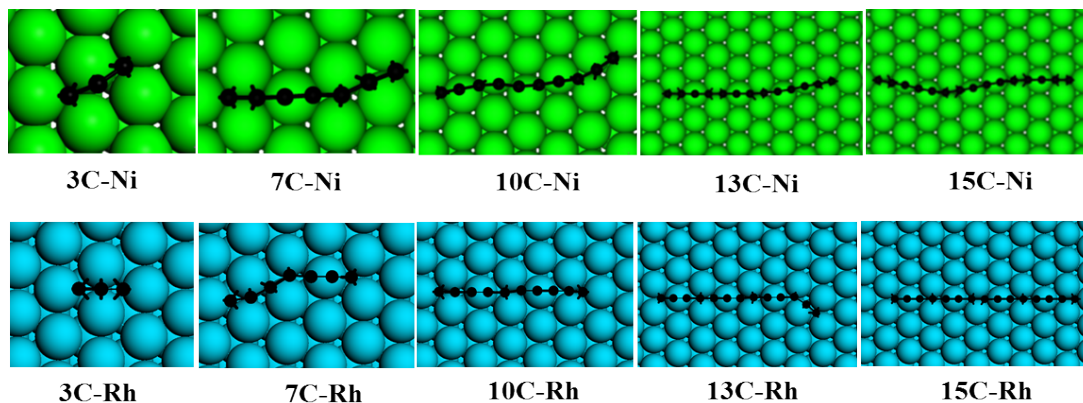

**Fig. S1** Selected structures of carbon chains (3C, 7C, 10C, 13C, 15C) on Ni(111) and Rh(111) surfaces.

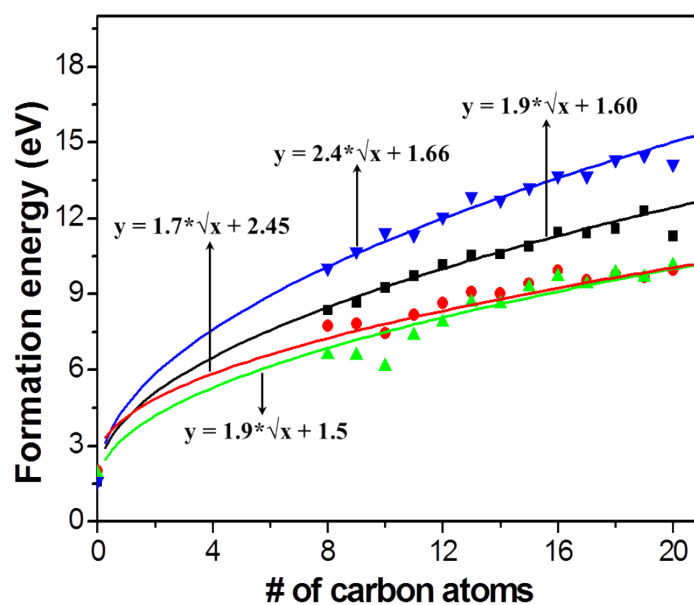

**Fig. S2** Formation energies of carbon island consisting of 8–19 atoms on Cu(111), Rh(111), Ru(0001) and Ni(111) surfaces, and the fitting curves for these energies using formula (2).

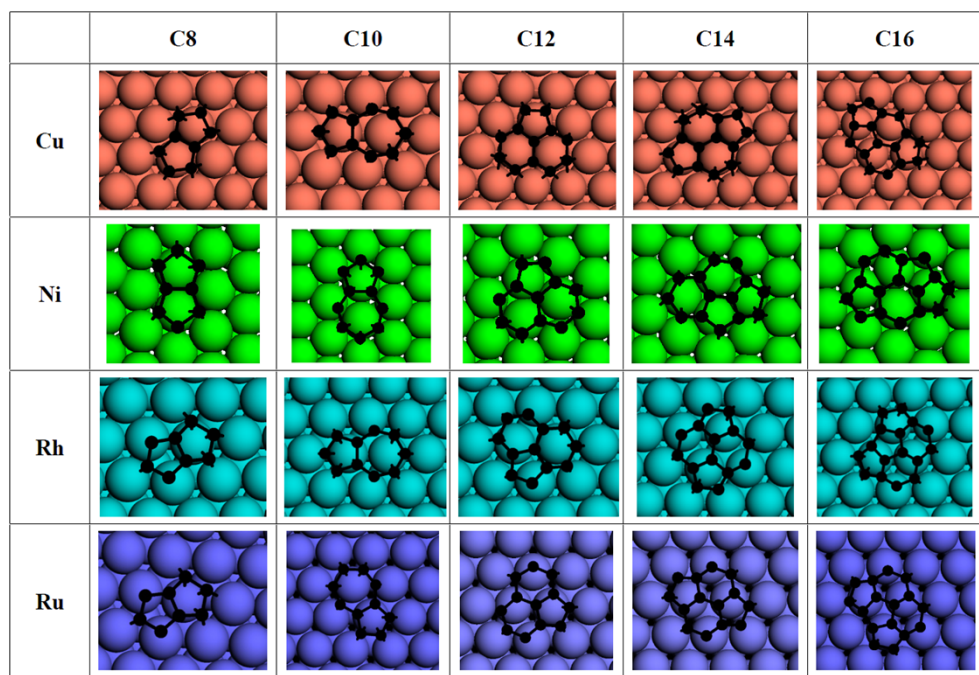

**Fig. S3** Selected carbon island structures (8C, 10C, 12C, 14C, 16C) on Cu(111), Ni(111), Rh(111) and Ru(0001) surfaces.

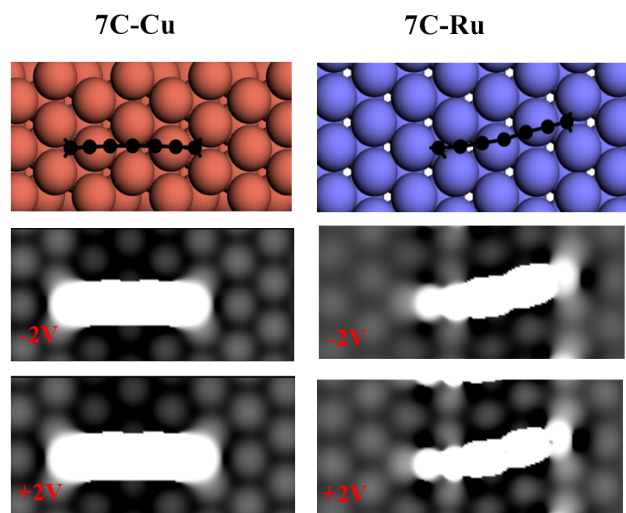

**Fig. S4** Simulated STM for carbon chain with 7 carbon atoms on Cu(111) and Ru(0001) surfaces.

## References

- 1 J. F. Gao, J. Yip, J. J. Zhao, B. I. Yakobson, F. Ding, *J. Am. Chem. Soc.*, 2011, **133**, 5009.
- 2 G. Kresse, J. Furthmüller, *Comput. Mater. Sci.*, 1996, **6**, 15.
- 3 G. Kresse, J. Furthmüller, *Phys. Rev. B*, 1996, **54**, 11169.

- 4 P. E. Blöchl, *Phys. Rev. B*, 1994, **50**, 17953.
- 5 J. P. Perdew, K. Burke, M. Ernzerhof, *Phys. Rev. Lett.*, 1996, **77**, 3865.
- 6 J. Tersoff, D. R. Hamann, *Phys. Rev. B*, 1985, **31**, 805.
